# Supplementary material
Source: PubMed Central journal article supplement (PMC2217569)

**A**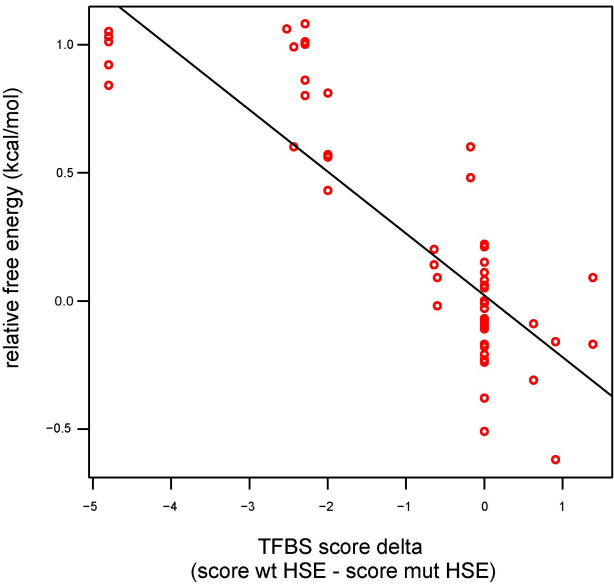**B**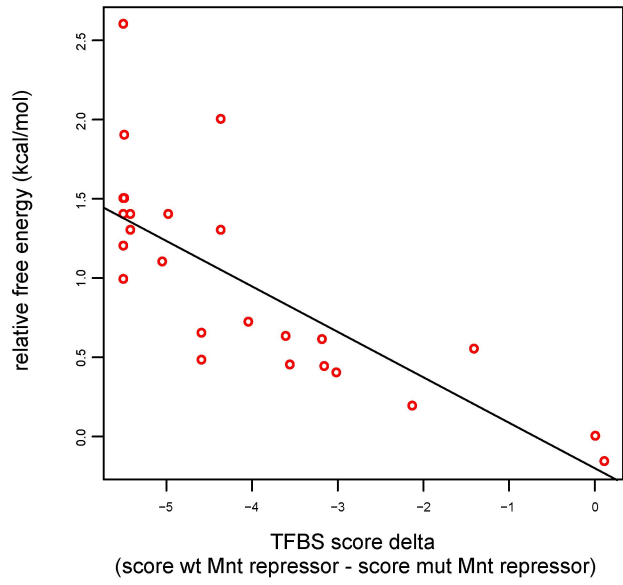

Supplement: pcbi.0040005.sg001.pdf [file pcbi.0040005.sg001.pdf]
